# Supplementary material for: Inkjet-printed highly conductive transparent patterns with water based Ag-doped graphene
Source: Royal Society of Chemistry journal article supplement (doi:10.1039/c4ta04156a), 2014-01-01
Supplement: c4ta04156a1.pdf [file c4ta04156a1.pdf]

## † Electronic Supporting Information

### **Inkjet-Printed Highly Conductive Transparent Patterns with Water Based Ag-Doped Graphene†**

**Lihong Li, Yuzhen Guo, Xingye Zhang, Yanlin Song,\***

*Key Laboratory of Green Printing, Institute of Chemistry, Chinese Academy of Sciences, Beijing, China. Fax: 86 6252 9284; Tel: 86 6252 9284; E-mail: ylsong@iccas.ac.cn*

#### **Experimental**

In a typical synthesis of Ag nanoplates (Ag NTPs), 45  $\mu\text{l}$  of  $\text{AgNO}_3$  (0.1 M), 3 ml of TCD and 100  $\mu\text{l}$  of  $\text{H}_2\text{O}_2$  (30 wt%) were dissolved in 50 ml of  $\text{H}_2\text{O}$  under vigorous stirring. 250  $\mu\text{l}$  of ice-cold  $\text{NaBH}_4$  was injected into the mixture, which turned yellow, black and then blue within a few minutes, and after 30 min the precursor sample was centrifuged and washed with  $\text{H}_2\text{O}$  twice. The collected sample was redispersed in 10 ml of  $\text{H}_2\text{O}$ . To this solution was added 1 ml of PVP (5 wt%) and 40  $\mu\text{l}$  of ascorbic acid (0.5 M), and then 0.6 ml of  $\text{AgNO}_3$  slowly under stirring. After that, 300  $\mu\text{l}$  of TCD was added subsequently, and then a mixed solution containing 60  $\mu\text{l}$  of  $\text{AgNO}_3$  (0.1 M), 900  $\mu\text{l}$  of TCD was also added slowly (5  $\mu\text{L/s}$ ), for lateral growth of the Ag nanoplates. The reaction was allowed to proceed for one additional hour. The sample was collected by centrifugation and vacuum rotary evaporation.

In a typical synthesis of Ag nanoparticles (Ag NPs), 100  $\mu\text{L}$  of the aqueous solution of TCD (10wt %) and 25  $\mu\text{L}$  of the aqueous solution of  $\text{AgNO}_3$  (10wt %) were consecutively added to 2.5 mL of water under stirring at room temperature, and the colour of the mixture was from white to colorless. 50  $\mu\text{L}$  of the aqueous solution of AC (0.10 mM) and KI (5  $\mu\text{M}$ ) was in sequence added into 47.5 mL of water at 80  $^\circ\text{C}$ . Then, the aqueous solution was kept heating and the mixture solution of TCD and  $\text{AgNO}_3$  was injected into it. The yellow reaction solution was kept at 100  $^\circ\text{C}$  for 1 h under stirring to warrant formation of uniform polyhedral Ag nanoparticles. The sample was washed by water and ethanol, and collected by centrifugation and vacuum rotary evaporation.

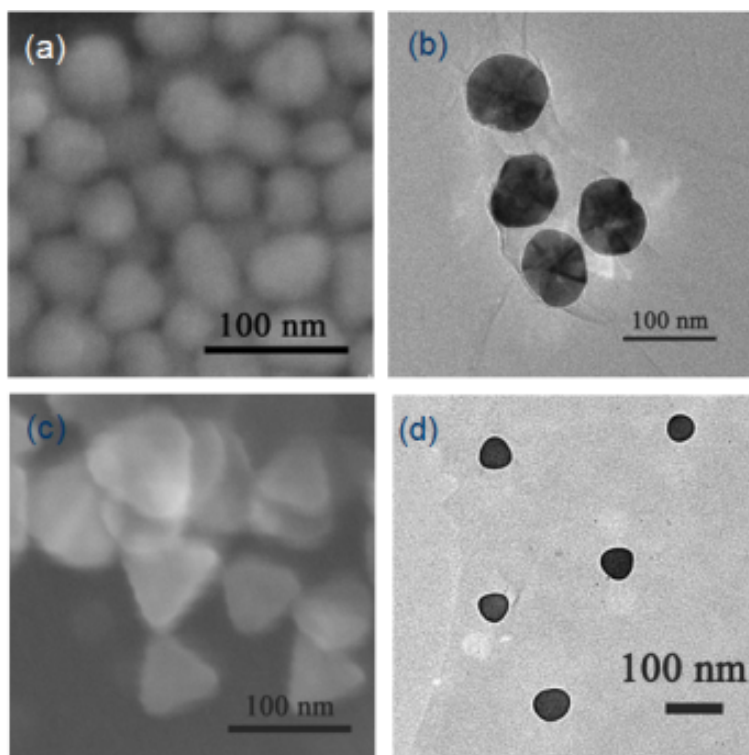

**Fig. S1** The SEM images of as-synthesized (a)Ag NPs, (c)Ag NTPs, the TEM images of as-synthesized (b)Ag NPs-GO, (d) Ag NTPs-GO.

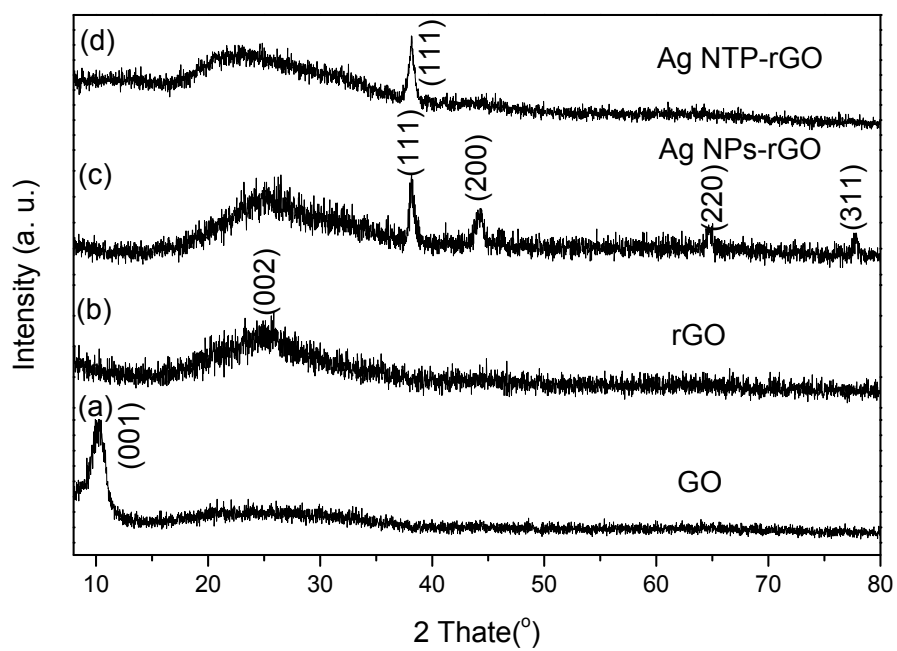

**Fig. S2** The XRD spectra of as-synthesized (a) GO, (b) rGO, (c) Ag NPs-rGO, and (d) Ag NTPs-rGO.

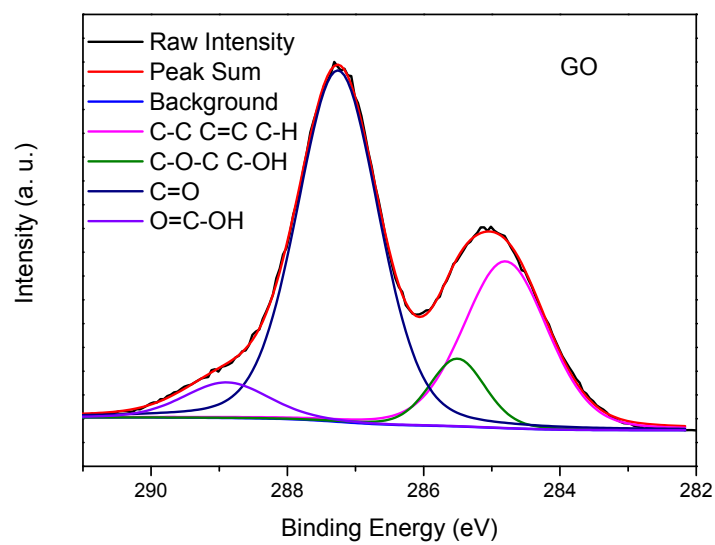

**Fig. S3 The XPS spectrum of C1s peaks of as-synthesized GO.**

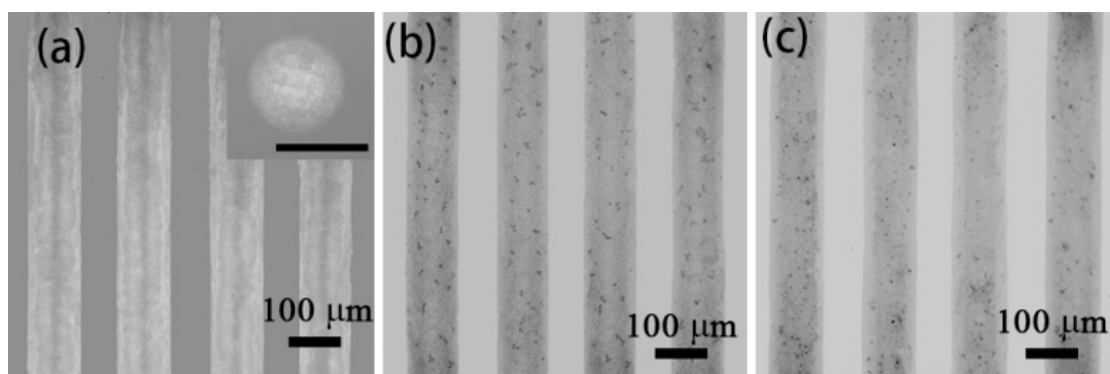

**Fig. S4 Morphology of the inkjet-printed rGO-based patterns on glass substrates. Optical microscopy images of (a) printed lines and a drop (inset, scale bar corresponds to 40  $\mu\text{m}$ ) of rGO illustrate the uniformity of the printed features. (b) Printed lines of Ag NPs-rGO. (c) Printed lines of Ag NTPs-rGO.**

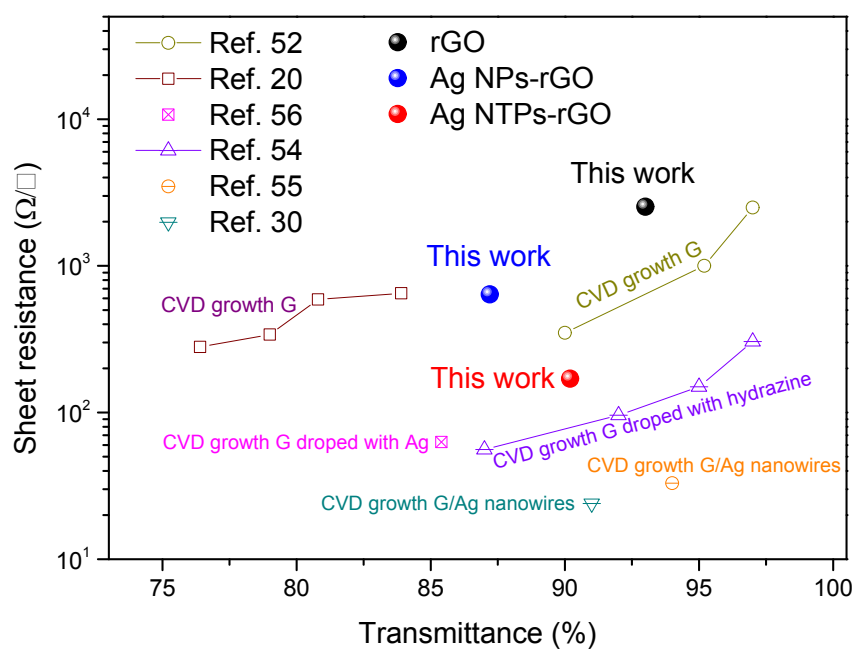

**Fig. S5 Sheet resistance vs transmittance of inkjet-printed rGO-based patterns compared to reported transparent CVD-growth G-based results.**

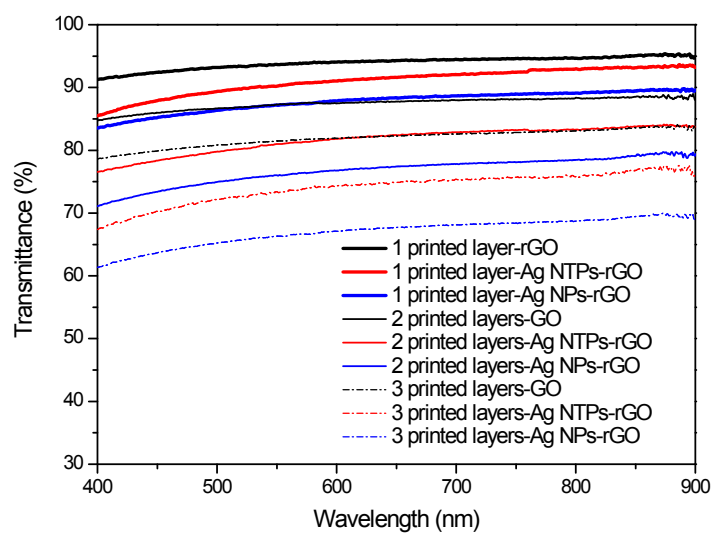

**Fig. S6 The transmittance as a function of wavelength for the different inkjet-printed layers of rGO-based patterns.**

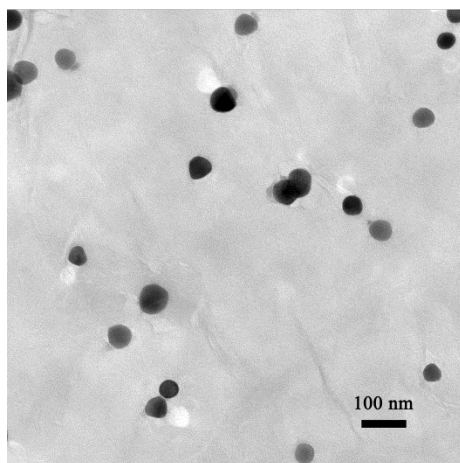

**Fig. S7 The TEM images of as-prepared Ag NTPs-rGO.**

**Table S1. Analysis of C1s peak positions and the relative percentages of different C species with respect to (a)GO, (b)rGO, (c)Ag NPs-rGO, and (d) Ag NTPs-rGO.**

|                    | C-C C=C C-H   | C-O           | C=O           | COOH         |
|--------------------|---------------|---------------|---------------|--------------|
| <b>GO</b>          | 284.8 (28.4%) | 285.5 (7.6%)  | 287.2 (57.9%) | 288.9 (6.1%) |
| <b>rGO</b>         | 284.8 (68.2%) | 285.5 (14.5%) | 287.2 (14%)   | 288.9 (3.3%) |
| <b>Ag NPs-rGO</b>  | 284.8 (70.6%) | 285.6 (13%)   | 287.3 (13.2%) | 289.2 (3.5%) |
| <b>Ag NTPs-rGO</b> | 284.8 (85.4%) | 285.8 (9.7%)  | 287.2 (3.1%)  | 289.2 (1.8%) |
